# Supplementary material for: Radiosensitization of HSF-1 Knockdown Lung Cancer Cells by Low Concentrations of Hsp90 Inhibitor NVP-AUY922
Source: MDPI journal article supplement (doi:10.3390/cells8101166), 2019-09-28
Supplement: s1 [file s1]

# Supplementary Material

Suppl. Fig. 1

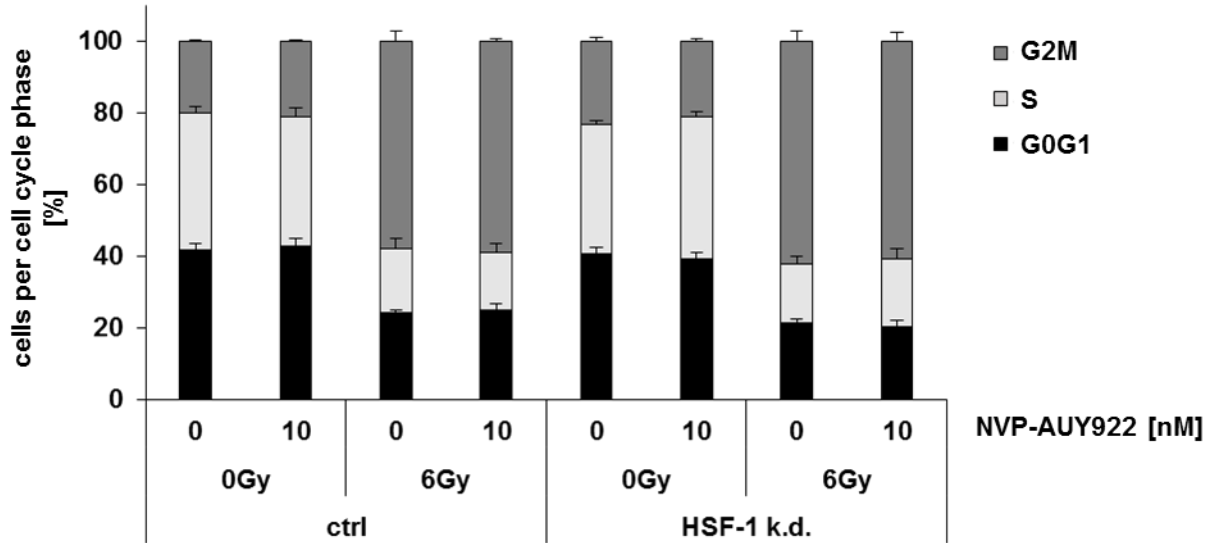

**Suppl. Fig. 1 HSF-1 knockdown cells show no difference in cell cycle distribution after combined Hsp90 inhibition and irradiation**

H1339 ctrl and HSF-1 k.d. cells were treated with 10nM NVP-AUY922 for 24h and irradiated with 6Gy. Cells were stained with PI to analyse cell cycle distribution 24h after irradiation.

# Supplementary Material

Suppl. Fig. 2

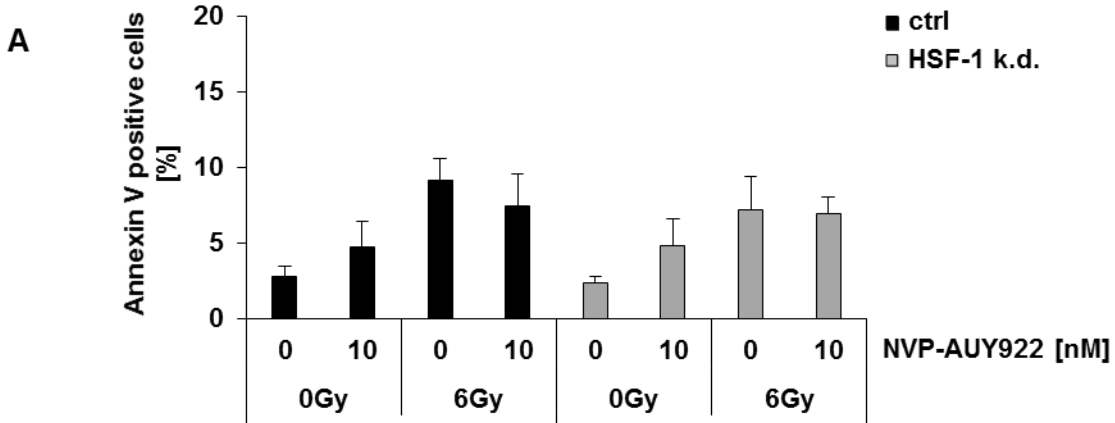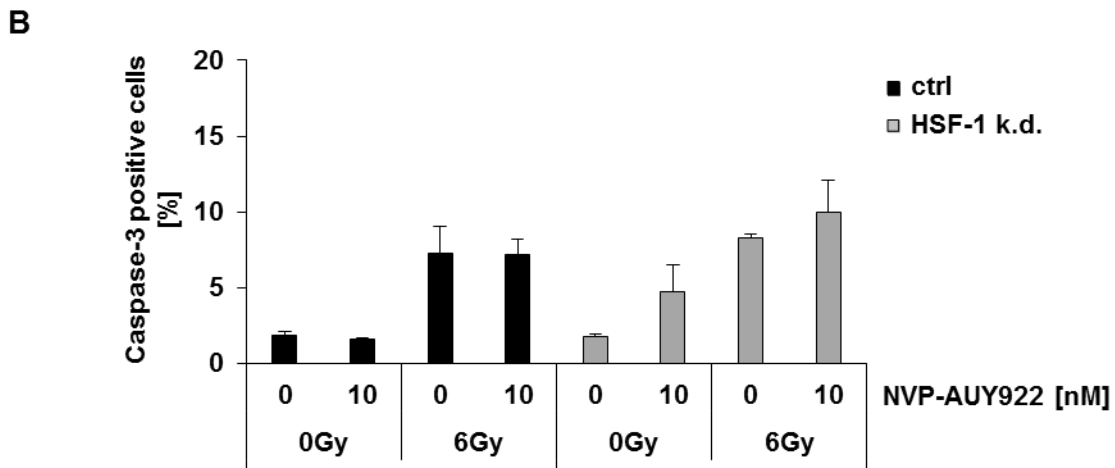

**Suppl. Fig. 2 HSF-1 knockdown and control cells show no difference in apoptosis induction after combined Hsp90 inhibition and irradiation**

**A.** Measurement of apoptosis induction 24h after irradiation by Annexin V and **B.** Caspase-3 staining of H1339 ctrl and HSF-1 k.d. cells treated with 10nM NVP-AUY922 for 24h following irradiation with 6Gy.

# Supplementary Material

## Supplementary Table 1: Summary of radiobiological parameters

**A.** Loss of HSF-1 per se has no influence on radiosensitivity.  $D_{50}$ , dose to reduce survival fraction to 50%. Sensitizing enhancement ratio (SER) =  $D_{50}(\text{irradiation ctrl})/D_{50}(\text{irradiation HSF-1 k.d.})$ .

**B.** Radiosensitizing effect of Hsp90 inhibition is much more pronounced in H1339 HSF-1 k.d. cells compared to control cells. SER ( $D_{50}(\text{irradiation})/D_{50}(\text{irradiation} + \text{drug})$ ) greater than 1.20 is indicative for radiosensitization (indicated in bold).

Tab.1

A

| $D_{50}$<br>dosis [Gy] |            | SER (50%) |            |
|------------------------|------------|-----------|------------|
| ctrl                   | HSF-1 k.d. | ctrl      | HSF-1 k.d. |
| 2.01                   | 2.21       | 1         | 0.91       |

B

|                 | SER (50%)   |             |
|-----------------|-------------|-------------|
| NVP-AUY922 [nM] | ctrl        | HSF-1 k.d.  |
| 0               | 1           | 1           |
| 1               | 1.09        | <b>1.92</b> |
| 2               | 0.94        | <b>1.53</b> |
| 5               | <b>1.89</b> | <b>2.38</b> |
